# Supplementary material for: A Patient Outcomes–Driven Feedback Platform for Emergency Medicine Clinicians: Human-Centered Design and Usability Evaluation of Linking Outcomes Of Patients (LOOP)
Source: PubMed Central journal article supplement (PMC8987968; doi:10.2196/30130), 2022-03-23
Supplement: humanfactors_v9i1e30130_app1.pdf [file humanfactors_v9i1e30130_app1.pdf]

 Mark your feelings for us!

# HELLO, HOW ARE YOU TODAY?

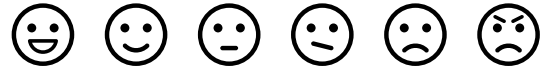

## 01. JUST FOR OUR INFORMATION,

GENDER:

YEARS OF EXPERIENCE:

NAME OF HOSPITAL:            JHH            HCGH

CIRCLE ROLE:    Attending    Resident    PA    RN

## 02. HOW DO YOU CURRENTLY FIND OUT WHAT HAPPENED TO YOUR PATIENTS AFTER THEIR ED VISIT?

(Circle all that apply)

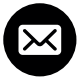

E-MAIL

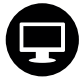

EHR

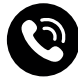

PHONE CALL

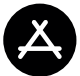

ONLINE / APP:

\_\_\_\_\_

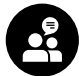

FACE TO FACE CONVERSATION

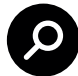

OTHERS:

\_\_\_\_\_

## 03. HOW WOULD YOU PREFER TO LEARN WHAT HAPPENED TO YOUR PATIENTS AFTER THEIR ED VISIT?

(Circle all that apply)

### WHAT FORMAT?

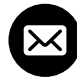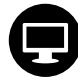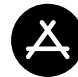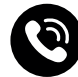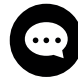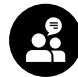

### WHAT KIND OF FEEDBACK?

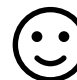

GOOD

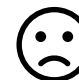

BAD

### FROM WHOM?

SUPERVISOR

PEER DOCTORS

NURSES

PATIENTS

OTHERS: \_\_\_\_\_

## 05. WHAT POST-ED VISIT INFORMATION ABOUT DISCHARGED PATIENTS WOULD HELP YOU MAKE BETTER DECISIONS FOR FUTURE PATIENTS?

(Choose top five information. If you choose the information contains a blank space, please fill the blank)

- Deaths within \_\_\_\_ days of ED departure?
- Patients who filled prescriptions for antibiotics?
- Patients who visited a primary care doctor within \_\_\_\_ days?
- Patients who visited an urgent care center within \_\_\_\_ days?
- Patients who returned to any ED within \_\_\_\_ hours?
- Patients who returned to any ED and were admitted within \_\_\_\_ days?
- \_\_\_\_\_

---

**06. WHAT POST-ED VISIT INFORMATION ABOUT ADMITTED / OBSERVED PATIENTS WOULD HELP YOU MAKE BETTER DECISIONS FOR FUTURE PATIENTS?**

(Choose top five information. If you choose the information contains a blank space, please fill the blank)

- |                                                                                        |                                                                                                       |
|----------------------------------------------------------------------------------------|-------------------------------------------------------------------------------------------------------|
| <input type="checkbox"/> Deaths within ____ days of ED departure?                      | <input type="checkbox"/> Conversion from observation to admission status?                             |
| <input type="checkbox"/> In-hospital death?                                            | <input type="checkbox"/> Admitted patients who do not meet payer admission criteria?                  |
| <input type="checkbox"/> Initiation of NIPPV or intubation and mechanical ventilation? | <input type="checkbox"/> Discrepancy between admitting ED diagnoses and hospital discharge diagnoses? |
| <input type="checkbox"/> New initiation or discontinuation of antibiotics?             | <input type="checkbox"/> Patients who develop Sepsis in-hospital?                                     |
| <input type="checkbox"/> Change in antibiotics (spectrum)?                             | <input type="checkbox"/> _____                                                                        |
| <input type="checkbox"/> Change in antibiotics (dose)?                                 |                                                                                                       |
| <input type="checkbox"/> Change in level of care within ____ hours of admission?       |                                                                                                       |
- 

**07. WHAT THINGS (INDIVIDUAL, INSTITUTIONAL) CURRENTLY COMPLICATE YOUR DECISION MAKING?**

INDIVIDUAL

INSTITUTIONAL

“THANK YOU FOR PARTICIPATING IN THIS SURVEY!”
